# Supplementary material for: Stromal Cells Positively and Negatively Modulate the Growth of Cancer Cells: Stimulation via the PGE2-TNFα-IL-6 Pathway and Inhibition via Secreted GAPDH-E-Cadherin Interaction
Source: PubMed Central journal article supplement (PMC4364666; doi:10.1371/journal.pone.0119415), 2015-03-18
Supplement: pone.0119415.s019.pdf [file pone.0119415.s019.pdf]

# Figure S19

**A**

Lateral side

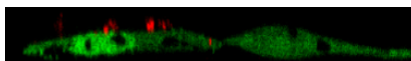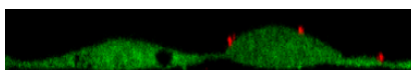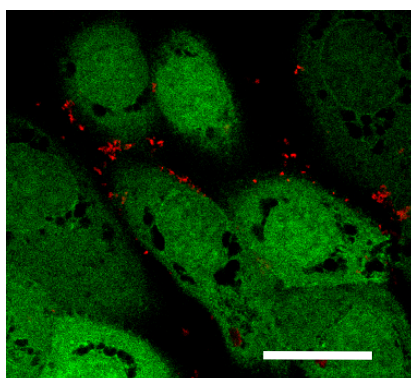

Green:GFP  
Red:anti-FLAG

**B**

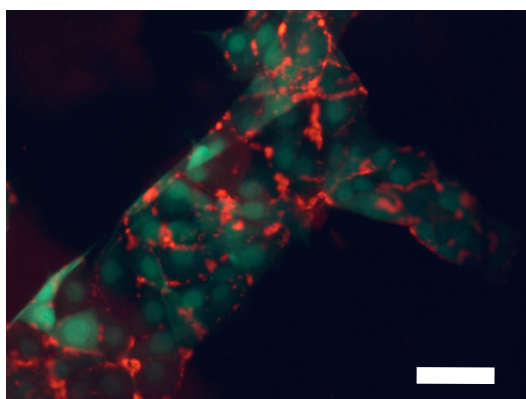

Green:GFP  
Red:anti-GAPDH

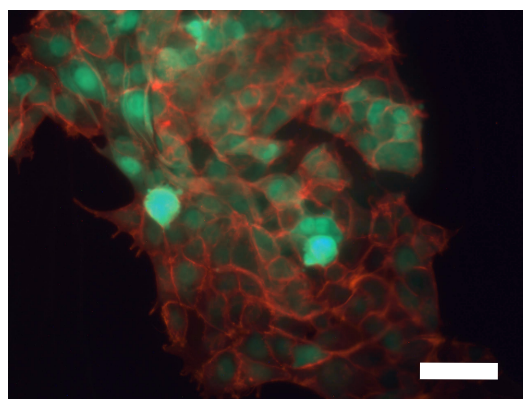

Green:GFP  
Red:anti-E-cadherin
