# Supplementary material for: Stromal Cells Positively and Negatively Modulate the Growth of Cancer Cells: Stimulation via the PGE2-TNFα-IL-6 Pathway and Inhibition via Secreted GAPDH-E-Cadherin Interaction
Source: PubMed Central journal article supplement (PMC4364666; doi:10.1371/journal.pone.0119415), 2015-03-18
Supplement: pone.0119415.s022.pdf [file pone.0119415.s022.pdf]

**Figure S22**

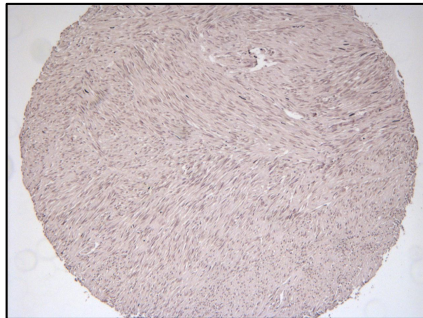

**57F GIST**

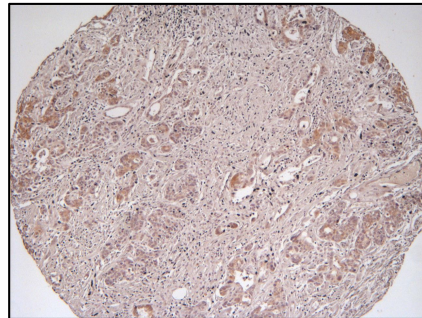

**66M adenocarcinoma IIB**

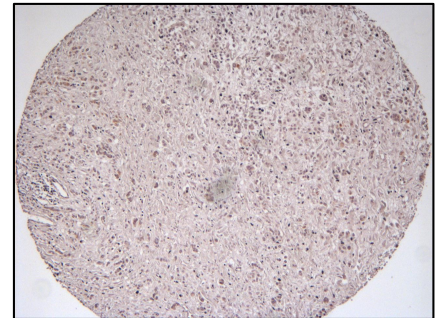

**52F signet ring cell carcinoma IIB**

|                            | Total | p-STAT3 (%) |                 |          |
|----------------------------|-------|-------------|-----------------|----------|
|                            |       | Negative    | Weakly positive | Positive |
| GIST                       | 7     | 7 (100.0)   | 0 (0.0)         | 0 (0.0)  |
| Adenocarcinoma             | 19    | 6 (31.6)    | 7 (36.8)        | 6 (31.6) |
| Signet ring cell carcinoma | 14    | 7 (50.0)    | 5 (35.7)        | 2 (14.3) |
