# Supplementary material for: Stromal Cells Positively and Negatively Modulate the Growth of Cancer Cells: Stimulation via the PGE2-TNFα-IL-6 Pathway and Inhibition via Secreted GAPDH-E-Cadherin Interaction
Source: PubMed Central journal article supplement (PMC4364666; doi:10.1371/journal.pone.0119415), 2015-03-18

Figure S25

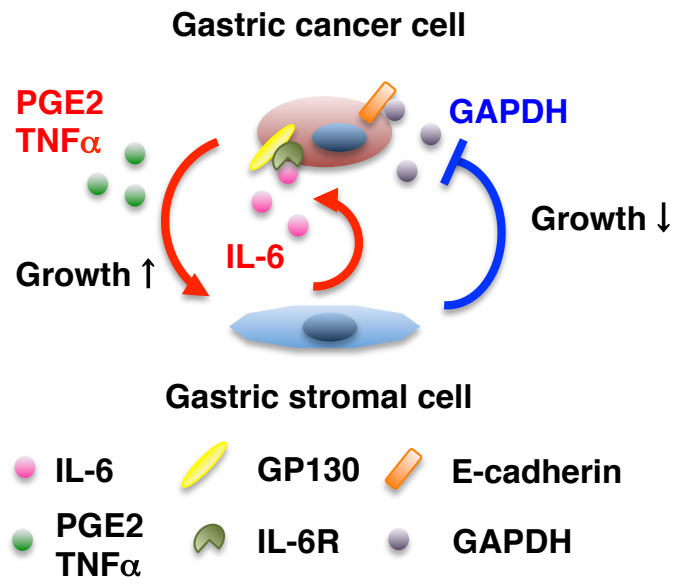

Supplement: pone.0119415.s025.pdf [file pone.0119415.s025.pdf]
