# Supplementary material for: Stromal Cells Positively and Negatively Modulate the Growth of Cancer Cells: Stimulation via the PGE2-TNFα-IL-6 Pathway and Inhibition via Secreted GAPDH-E-Cadherin Interaction
Source: PLoS One. 2015 Mar 18;10(3):e0119415. doi: 10.1371/journal.pone.0119415 (PMC4364666; doi:10.1371/journal.pone.0119415)

### Figure S5

## SCADS inhibitor kit I

MKN-7 MKN-74

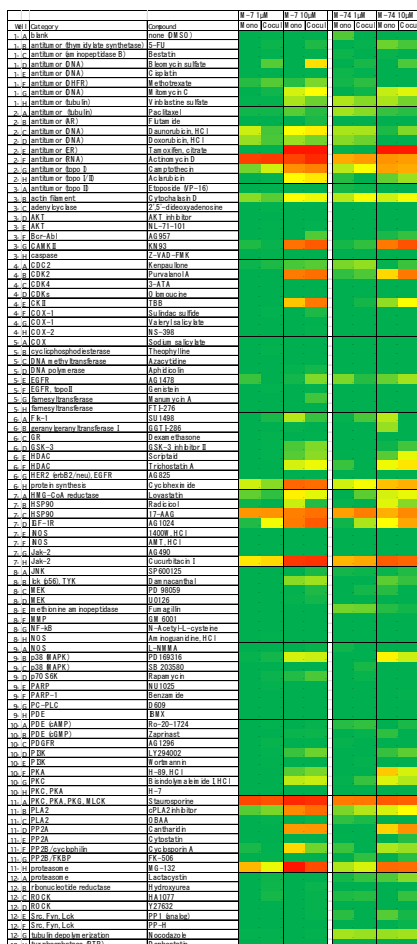

## SCADS inhibitor kit II

MKN-7 MKN-74

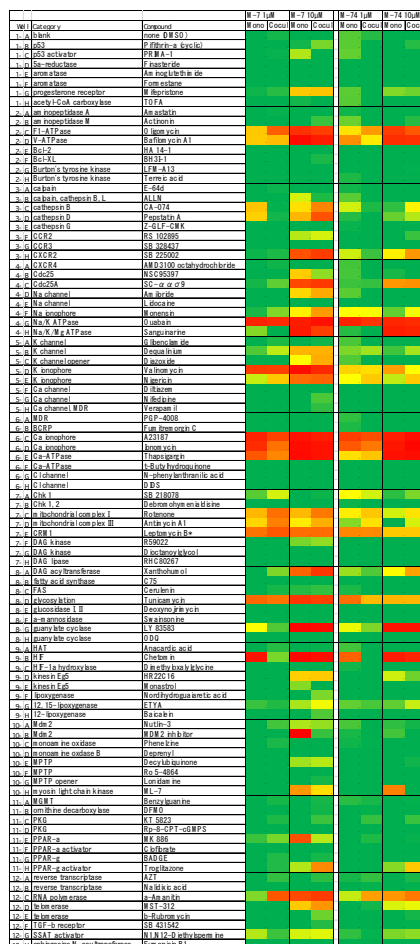

### SCADS inhibitor kit III

MKN-7 MKN-74

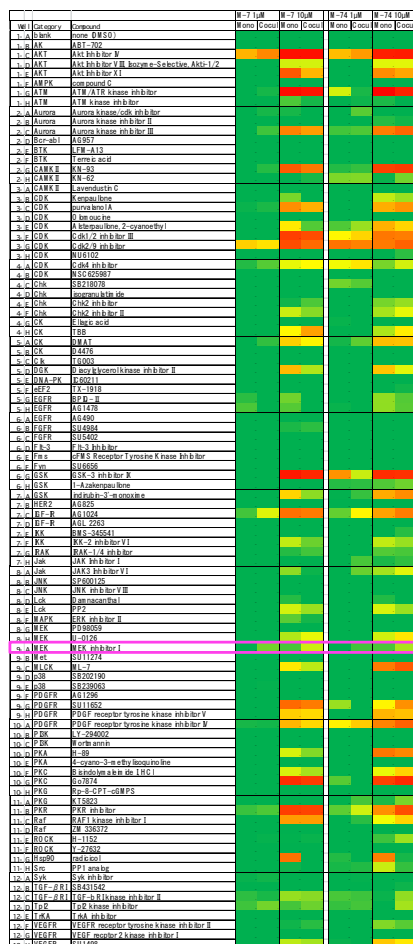

**Cell growth (%)**

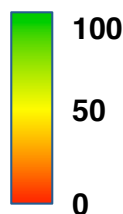

Supplement: S5 Fig — MKN-7 and MKN-74 cells were cultured with or without Hs738 cells for 3 days in the presence of various inhibitors (about 300 compound; for details, http://scads.jfcr.or.jp/kit/kit.html) at 1 and 10 μM. The growth of cancer cells was expressed as a heat map. An arrow indicates the position of MEK inhibitor I. (PDF) [file pone.0119415.s005.pdf]
