# Supplementary material for: Stromal Cells Positively and Negatively Modulate the Growth of Cancer Cells: Stimulation via the PGE2-TNFα-IL-6 Pathway and Inhibition via Secreted GAPDH-E-Cadherin Interaction
Source: PLoS One. 2015 Mar 18;10(3):e0119415. doi: 10.1371/journal.pone.0119415 (PMC4364666; doi:10.1371/journal.pone.0119415)
Supplement: S11 Fig — Hs738 cells were cultured with or without 10 μM MEK inhibitor I for 2 days. The cultured supernatants were applied onto human cytokine antibody array (C series 2000; for details, http://www.raybiotech.com). Arrows indicate the positions of IL-6 and CXCL1 duplicated spots. Lower panels are lists of the arrays. (PDF) [file pone.0119415.s011.pdf]

### Figure S11

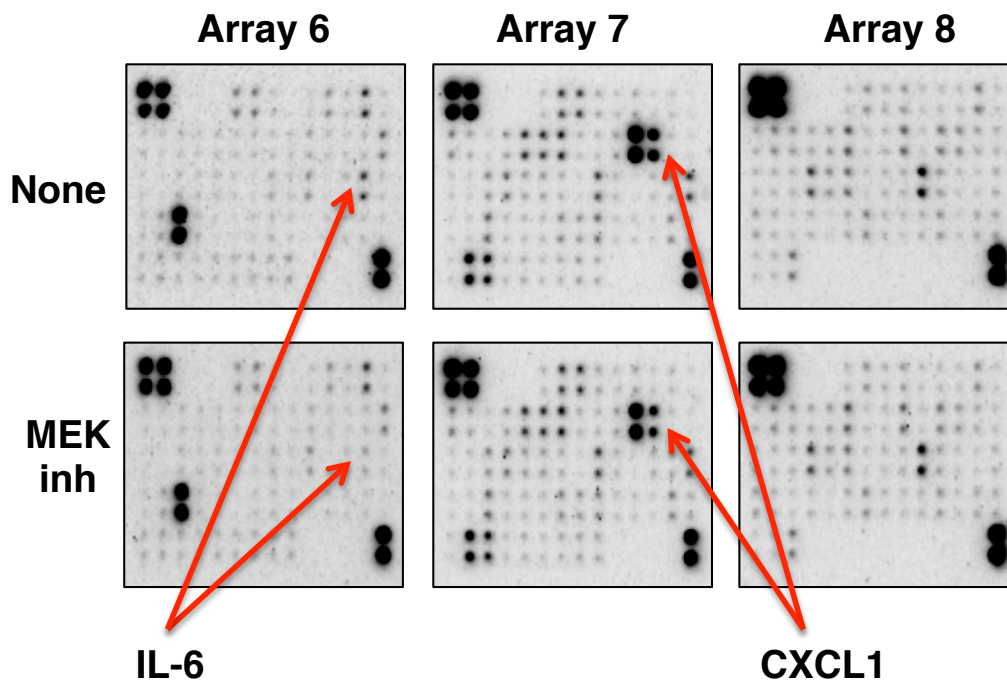

| RayBio Human Cytokine Antibody Array 6 (60) |             |              |              |                |               |                |                |                |                 |                |                 |               |             |              |
|---------------------------------------------|-------------|--------------|--------------|----------------|---------------|----------------|----------------|----------------|-----------------|----------------|-----------------|---------------|-------------|--------------|
|                                             | a           | b            | c            | d              | e             | f              | g              | h              | i               | j              | k               | l             | m           | n            |
| 1                                           | POS         | POS          | NEG          | NEG            | Blank         | Angiogenin     | BDNF           | ILC            | BMP-4           | BMP-6          | CK $\beta$ 8-1  | CNTF          | EGF         | Eotaxin      |
| 2                                           | POS         | POS          | NEG          | NEG            | Blank         | Angiogenin     | BDNF           | ILC            | BMP-4           | BMP-6          | CK $\beta$ 8-1  | CNTF          | EGF         | Eotaxin      |
| 3                                           | Eotaxin-2   | Eotaxin-3    | FGF-6        | FGF-7          | Fr-t-3 Ligand | Fractalkine    | GCP-2          | GDNF           | GM-CSF          | I-309          | IFN- $\gamma$   | IKGFB-1       | IKGFB-2     | IKGFB-4      |
| 4                                           | Eotaxin-2   | Eotaxin-3    | FGF-6        | FGF-7          | Fr-t-3 Ligand | Fractalkine    | GCP-2          | GDNF           | GM-CSF          | I-309          | IFN- $\gamma$   | IKGFB-1       | IKGFB-2     | IKGFB-4      |
| 5                                           | IGF-1       | IL-10        | IL-13        | IL-15          | IL-16         | IL-1 $\alpha$  | IL-1 $\beta$   | IL-1ra         | IL-2            | IL-3           | IL-4            | IL-5          | IL-6        | IL-7         |
| 6                                           | IGF-1       | IL-10        | IL-13        | IL-15          | IL-16         | IL-1 $\alpha$  | IL-1 $\beta$   | IL-1ra         | IL-2            | IL-3           | IL-4            | IL-5          | IL-6        | IL-7         |
| 7                                           | Leptin      | LIGHT        | MCP-1        | MCP-2          | MCP-3         | MCP-4          | M-CSF          | MDC            | MIG             | MIP-1 $\delta$ | MIP-3 $\alpha$  | NAP-2         | NT-3        | PARC         |
| 8                                           | Leptin      | LIGHT        | MCP-1        | MCP-2          | MCP-3         | MCP-4          | M-CSF          | MDC            | MIG             | MIP-1 $\delta$ | MIP-3 $\alpha$  | NAP-2         | NT-3        | PARC         |
| 9                                           | PDGF-BB     | RANTES       | SCF          | SDF-1          | TARC          | TFG- $\beta$ 1 | TFG- $\beta$ 3 | TNF- $\alpha$  | TNF- $\beta$    | Blank          | Blank           | Blank         | Blank       | POS          |
| 10                                          | PDGF-BB     | RANTES       | SCF          | SDF-1          | TARC          | TFG- $\beta$ 1 | TFG- $\beta$ 3 | TNF- $\alpha$  | TNF- $\beta$    | Blank          | Blank           | Blank         | Blank       | POS          |
|                                             |             |              |              |                |               |                |                |                |                 |                |                 |               |             |              |
| RayBio Human Cytokine Antibody Array 7 (60) |             |              |              |                |               |                |                |                |                 |                |                 |               |             |              |
|                                             | a           | b            | c            | d              | e             | f              | g              | h              | i               | j              | k               | l             | m           | n            |
| 1                                           | POS         | POS          | NEG          | NEG            | Blank         | Acr30Aa9P      |                | Angiopoietin-2 | Amphiregulin    | Axl            | lFGF            | b-NGF         | BTc         | CCL-28       |
| 2                                           | POS         | POS          | NEG          | NEG            | Blank         | Acr30Aa9P      |                | Angiopoietin-2 | Amphiregulin    | Axl            | lFGF            | b-NGF         | BTc         | CCL-28       |
| 3                                           | CTACK       | Dk           | EGF-R        | ENA-78         | Fas/TNFRSF6   | FGF-4          | FGF-9          | GCSF           | GITR-Ligand     | GITR           | GRO             | GRO- $\alpha$ | HCC-4       | HGF          |
| 4                                           | CTACK       | Dk           | EGF-R        | ENA-78         | Fas/TNFRSF6   | FGF-4          | FGF-9          | GCSF           | GITR-Ligand     | GITR           | GRO             | GRO- $\alpha$ | HCC-4       | HGF          |
| 5                                           | ICAM-1      | ICAM-3       | IKGFB-3      | IKGFB-6        | IGF-1 SR      | IL-1 R4/ST2    | IL-1 R1        | IL-11          | IL-12p40        | IL-12p70       | IL-17           | IL-2 R alpha  | IL-6 R      | IL-8         |
| 6                                           | ICAM-1      | ICAM-3       | IKGFB-3      | IKGFB-6        | IGF-1 SR      | IL-1 R4/ST2    | IL-1 R1        | IL-11          | IL-12p40        | IL-12p70       | IL-17           | IL-2 R alpha  | IL-6 R      | IL-8         |
| 7                                           | I-TAC       | Lymphotactin | MIF          | MIP-1 $\alpha$ | MIP-1 $\beta$ | MIP-1 $\alpha$ | MSP- $\alpha$  | NT-4           | Osteoprotegerin | Oncostatin M   | PGF             | sxp130        | sTNF R1     | sTNF R-8     |
| 8                                           | I-TAC       | Lymphotactin | MIF          | MIP-1 $\alpha$ | MIP-1 $\beta$ | MIP-3 $\alpha$ | MSP- $\alpha$  | NT-4           | Osteoprotegerin | Oncostatin M   | PGF             | sxp130        | sTNF R1     | sTNF R-8     |
| 9                                           | TECK        | TMMP-1       | TMMP-2       | Thrombopoietin | TRAIL R3      | TRAIL R4       | uPAR           | VEGF           | VEGF-D          | Blank          | Blank           | Blank         | Blank       | POS          |
| 10                                          | TECK        | TMMP-1       | TMMP-2       | Thrombopoietin | TRAIL R3      | TRAIL R4       | uPAR           | VEGF           | VEGF-D          | Blank          | Blank           | Blank         | Blank       | POS          |
|                                             |             |              |              |                |               |                |                |                |                 |                |                 |               |             |              |
| RayBio Human Cytokine Antibody Array 8 (54) |             |              |              |                |               |                |                |                |                 |                |                 |               |             |              |
|                                             | a           | b            | c            | d              | e             | f              | g              | h              | i               | j              | k               | l             | m           | n            |
| 1                                           | POS         | POS          | NEG          | NEG            | BLANK         | Activin A      | ALCAM          | B7-1(CD80)     | BMP-5           | BMP-7          | Cardiotrophin-1 | CD14          | CXCL-16     | DR6(TNFRSF2) |
| 2                                           | POS         | POS          | NEG          | NEG            | BLANK         | Activin A      | ALCAM          | B7-1(CD80)     | BMP-5           | BMP-7          | Cardiotrophin-1 | CD14          | CXCL-16     | DR6(TNFRSF2) |
| 3                                           | Endoglin    | ErB3         | E-Selectin   | Fas Ligand     | ICAM-2        | IGF-II         | IL-1 R1        | IL-10 R beta   | IL-13 R alpha-2 | IL-18 BP alpha | IL-18 R beta    | MMP-3         | IL-2 R beta | IL-2 R gamma |
| 4                                           | Endoglin    | ErB3         | E-Selectin   | Fas Ligand     | ICAM-2        | IGF-II         | IL-1 R1        | IL-10 R beta   | IL-13 R alpha-2 | IL-18 BP alpha | IL-18 R beta    | MMP-3         | IL-2 R beta | IL-2 R gamma |
| 5                                           | IL-21R      | IL-5 R alpha | IL-9         | IP-10          | LAP           | Leptin R       | LIF            | L-Selectin     | M-CSF R         | MMP-1          | MMP-13          | MMP-9         | MMP-1       | NGF R        |
| 6                                           | IL-21R      | IL-5 R alpha | IL-9         | IP-10          | LAP           | Leptin R       | LIF            | L-Selectin     | M-CSF R         | MMP-1          | MMP-13          | MMP-9         | MMP-1       | NGF R        |
| 7                                           | PDGF AA     | PDGF-AB      | PDGF R alpha | PDGF R beta    | PECAM-1       | Prolactin      | SDF R          | SDF-1beta      | Siglec-5        | TGF-alpha      | TGF-beta        | Tie-1         | Tie-2       | TMMP-4       |
| 8                                           | PDGF AA     | PDGF-AB      | PDGF R alpha | PDGF R beta    | PECAM-1       | Prolactin      | SDF R          | SDF-1beta      | Siglec-5        | TGF-alpha      | TGF-beta        | Tie-1         | Tie-2       | TMMP-4       |
| 9                                           | VE-Cadherin | VEGF R2      | VEGF R3      | BLANK          | BLANK         | BLANK          | BLANK          | BLANK          | BLANK           | BLANK          | BLANK           | BLANK         | BLANK       | POS          |
| 10                                          | VE-Cadherin | VEGF R2      | VEGF R3      | BLANK          | BLANK         | BLANK          | BLANK          | BLANK          | BLANK           | BLANK          | BLANK           | BLANK         | BLANK       | POS          |
